# Supplementary material for: C-C Motif Chemokine Ligand 2 Enhances Macrophage Chemotaxis, Osteogenesis, and Angiogenesis during the Inflammatory Phase of Bone Regeneration
Source: MDPI journal article supplement (doi:10.3390/biom13111665), 2023-11-18
Supplement: s1 [file s1]

## Supplementary information

Title: C-C Motif Chemokine Ligand 2 Enhances Macrophage Chemotaxis, Osteogenesis, and Angiogenesis during the Inflammatory Phase of Bone Regeneration

Supplemental figure S1. Indirect co-cultures with MSCs using transwell.

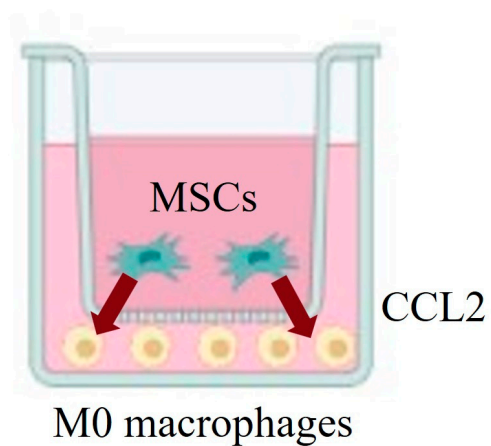

To evaluate the function of CCL2 secreted by MSCs, MSCs of each group were seeded on top of the transwells after seeding the macrophages.
